# Supplementary material
Source: MDPI journal article supplement (https://www.mdpi.com/2072-4292/15/3/859)
Supplement: s1 [file s1]

## Supplementary Data

**Table S1. Satellite Imageries details**

| Study Region | Row/Path           | Year   | 2000         | 2010        | 2020        |
|--------------|--------------------|--------|--------------|-------------|-------------|
|              |                    | Sensor | TM           | TM          | OLI         |
| Lahore       | 149/038            | Date   | 14, 30 May   | 11 June     | 22 June     |
|              |                    |        | 12, 28 April | 26, 10 May  | 05, 21 May  |
|              |                    |        | 11 March     | 8, 24 April | 3, 19 April |
|              |                    |        |              | 03 march    | 2, 18 March |
| Peshawar     | 151/036<br>151/037 | Date   | 13 June      | 16 June     | 04, 20 June |
|              |                    |        | 12, 28 May   | 03, 24 May  | 03, 19 May  |
|              |                    |        | 10 April     | 06 April    | 05 March    |
|              |                    |        | 09, 25 March | 05 March    |             |
| Swat         | 151/035<br>151/036 | Date   | 06 June      | 04, 18 June | 04, 20 June |
|              |                    |        | 12, 28 May   | 24 May      | 03, 19 May  |
|              |                    |        | 10 April     | 06 April    | 10 April    |
|              |                    |        | 09, 25 March | 05 March    |             |

### REDD+ Project

Reducing Emissions from Deforestation and Forest Degradation (REDD+) is an initiative to reduce deforestation and carbon emissions from forest ecosystems in developing countries. The REDD+ also includes the conservation of forests, sustainable forest management, and enhancing carbon stocks to facilitate developing countries in climate change mitigation [1, 2]. The REDD+ activities can be validated and monitored through the Measuring, Reporting, and Verification (MRV) system, the central part of the REDD+ mechanism, which ensures proper forest inventories and carbon estimation by national baselines or reference levels (RLs) [3-5].

### LULC Class divisions

- (i) Cultivated land (growing crops. Paddy fields, irrigated upland, rain-fed upland, vegetable land, cultivated pasture, greenhouse land, mainly planted with crops rarely with fruit trees or other trees, tea garden, coffee garden, and other economic cropland are included in this category).
- (ii) Vegetation (lands covered with trees, the maximum density of which occupies over 30%. Deciduous broadleaf forest, evergreen broadleaf forest, deciduous, coniferous forest, evergreen coniferous forest, mixed forest, and sparse woodland, the most excellent density covers 10%-30%, are included in this category, also surrounded by natural grass with a cover density of over 10%).
- (iii) Water bodies (covered by biogas or hygrophite plants and shallow water or wet soils. Inland marsh, lake marsh, river floodplain wetland, forest/shrub wetland, peat bogs, mangrove, salt marsh, etc.).
- (iv) Artificial surfaces (All kinds of habitation in urban and rural areas, industrial and mining, transportation facilities, etc.).
- (v) Bare land (land with a lower than 10% cover density): desert, sand, gravel ground, bare rocks, saline, alkaline lands, etc.).
- (vi) Permanent snow (covered by permanent snow, glacier, and icecap.)

**Table S2: Land use transitions 2000-2010 (Provinces)**

|               |                        | Cultivated land | Vegetation | Water bodies | Artificial Surfaces | Bare Land | Permanent Snow and Ice |
|---------------|------------------------|-----------------|------------|--------------|---------------------|-----------|------------------------|
| <b>KPK</b>    | Cultivated land        | 25315.7         | 530.5      | 46.8         | 46.3                | 19        | NA                     |
|               | Vegetation             | 640.8           | 27126.4    | 118.4        | 3.5                 | 1262.7    | 189.2                  |
|               | Water bodies           | 64.4            | 150.4      | 473.5        | 0.7                 | 37.5      | 1.4                    |
|               | Artificial Surfaces    | 36.0            | 7.1        | 1.02         | 619.5               | 0.4       | NA                     |
|               | Bare Land              | 203.8           | 4105.8     | 55.7         | 0.6                 | 10095.4   | 138.3                  |
|               | Permanent Snow and Ice | NA              | 541.6      | 0.18         | NA                  | 159.4     | 5024.3                 |
|               |                        |                 |            |              |                     |           |                        |
| <b>Punjab</b> | Cultivated land        | 135144.2        | 231.8      | 267.5        | 265.6               | 104.9     | NA                     |
|               | Vegetation             | 843.8           | 18261      | 540.2        | 11.2                | 1594.1    | NA                     |
|               | Water bodies           | 538.6           | 475.6      | 1360.7       | 3                   | 81.1      | NA                     |
|               | Artificial Surfaces    | 248.7           | 7.2        | 1.6          | 3578.8              | 9.7       | NA                     |
|               | Bare Land              | 350.1           | 2327.3     | 154.9        | 6.6                 | 43120.9   | NA                     |

**Table S3: Land use transitions 2000-2020 (Sites)**

|                 |                        | Cultivated land | Vegetation | Water bodies | Artificial Surfaces | Bare Land | Permanent Snow and Ice |
|-----------------|------------------------|-----------------|------------|--------------|---------------------|-----------|------------------------|
| <b>Peshawar</b> | Cultivated land        | 405.4           | 157.5      | 8.6          | 57.9                | 0.7       | NA                     |
|                 | Vegetation             | 103.8           | 834.1      | 3.3          | 19.01               | 56.5      | NA                     |
|                 | Water bodies           | 0.82            | 7.58       | 13.0         | 0.11                | 1.5       | NA                     |
|                 | Artificial Surfaces    | 6.3             | 14.07      | 0.7          | 44.4                | 5.7       | NA                     |
|                 | Bare Land              | 7.9             | 381.8      | 9.8          | 208.5               | 258.3     | NA                     |
|                 | Permanent Snow and Ice | NA              | NA         | NA           | NA                  | NA        | NA                     |
|                 |                        |                 |            |              |                     |           |                        |

|               |                        |       |         |      |        |        |        |
|---------------|------------------------|-------|---------|------|--------|--------|--------|
| <b>Swat</b>   | Cultivated land        | 930.6 | 147.17  | 6.75 | 30.67  | 0.31   | NA     |
|               | Vegetation             | 48.3  | 1984.86 | 4.02 | 5.07   | 112.81 | 29.66  |
|               | Water bodies           | 2.2   | 8.22    | 3.96 | 0.04   | 1.18   | 0.47   |
|               | Artificial Surfaces    | 0.79  | 0.06    |      | 21.44  |        | NA     |
|               | Bare Land              | 0.63  | 543.85  | 1.96 | 0.25   | 515.43 | 34.82  |
|               | Permanent Snow and Ice | NA    | 30.82   | NA   | NA     | 36.19  | 799.89 |
|               |                        |       |         |      |        |        |        |
| <b>Lahore</b> | Cultivated land        | 503.2 | 86.5    | 12.6 | 157.9  | 3.8    | NA     |
|               | Vegetation             | 97.6  | 134.31  | 1.26 | 150.13 | 173.04 | NA     |
|               | Water bodies           | 5.8   | 10.31   | 4.93 | 23.33  | 11.84  | NA     |
|               | Artificial Surfaces    | 0.8   | 19.13   | 4.42 | 283.11 | 143.11 | NA     |
|               | Bare Land              | 8.2   | 152.75  | 0.81 | 299.3  | 330.58 | NA     |
|               |                        | NA    | NA      | NA   | NA     | NA     | NA     |

**Table S4: LULC Transition Probabilities Kpk and Punjab 2000-2020**

|               |                        |                 |            |              |                     |           |                        |
|---------------|------------------------|-----------------|------------|--------------|---------------------|-----------|------------------------|
| <b>KPK</b>    |                        | Cultivated land | Vegetation | Water bodies | Artificial Surfaces | Bare Land | Permanent Snow and Ice |
|               | Cultivated land        | 0.9588          | 0.0235     | 0.0025       | 0.0152              | 0         | 0                      |
|               | Vegetation             | 0.0206          | 0.9058     | 0.0068       | 0.0008              | 0.0611    | 0.0049                 |
|               | Water bodies           | 0.0447          | 0.0836     | 0.8269       | 0.0005              | 0.0437    | 0.0006                 |
|               | Artificial Surfaces    | 0.0539          | 0.0045     | 0.0005       | 0.9408              | 0.0003    | 0                      |
|               | Bare Land              | 0.0059          | 0.1921     | 0.0015       | 0                   | 0.7939    | 0.0066                 |
|               | Permanent Snow and Ice | 0               | 0.0469     | 0            | 0                   | 0.0224    | 0.9307                 |
|               |                        |                 |            |              |                     |           |                        |
| <b>Punjab</b> |                        | Cultivated land | Vegetation | Water bodies | Artificial Surfaces | Bare Land | NA                     |

|  |                     |        |        |        |        |        |    |
|--|---------------------|--------|--------|--------|--------|--------|----|
|  | Cultivated land     | 0.9834 | 0.0009 | 0.0153 | 0.0003 | 0.0001 | NA |
|  | Vegetation          | 0.0162 | 0.9794 | 0.0027 | 0.0014 | 0.0002 | NA |
|  | Water bodies        | 0      | 0      | 1      | 0      | 0      | NA |
|  | Artificial Surfaces | 0.0352 | 0.146  | 0.0006 | 0.8181 | 0      | NA |
|  | Bare Land           | 0      | 0      | 0      | 0      | 1      | NA |

**Tabel S5: LULC gain and loss over Kpk and Punjab 2000-2020**

| KPK         |                 |            |              |                     |           |                        |
|-------------|-----------------|------------|--------------|---------------------|-----------|------------------------|
|             | Cultivated Land | Vegetation | Water Bodies | Artificial Surfaces | Bare Land | Permanent Snow and Ice |
| Losses      | 1282.5          | 2796.4     | 219.3        | 74.9                | 4848      | 755.1                  |
| Persistence | 24674.2         | 26541.1    | 508.4        | 589.2               | 9750.1    | 4969.3                 |
| Gains       | 1040            | 5716.6     | 333.7        | 506.9               | 2035.4    | 343.6                  |
| Punjab      |                 |            |              |                     |           |                        |
| Losses      | 3647.2          | 4592.4     | 1126.4       | 619.1               | 4352.6    | NA                     |
| Persistence | 132359.3        | 16655.5    | 1332.2       | 3226.9              | 41605     | NA                     |
| Gains       | 3285.1          | 4179.1     | 2507.7       | 1757.6              | 2608.3    | NA                     |

Figure S1 (a). Lahore Metropolitan area master Plan 2021

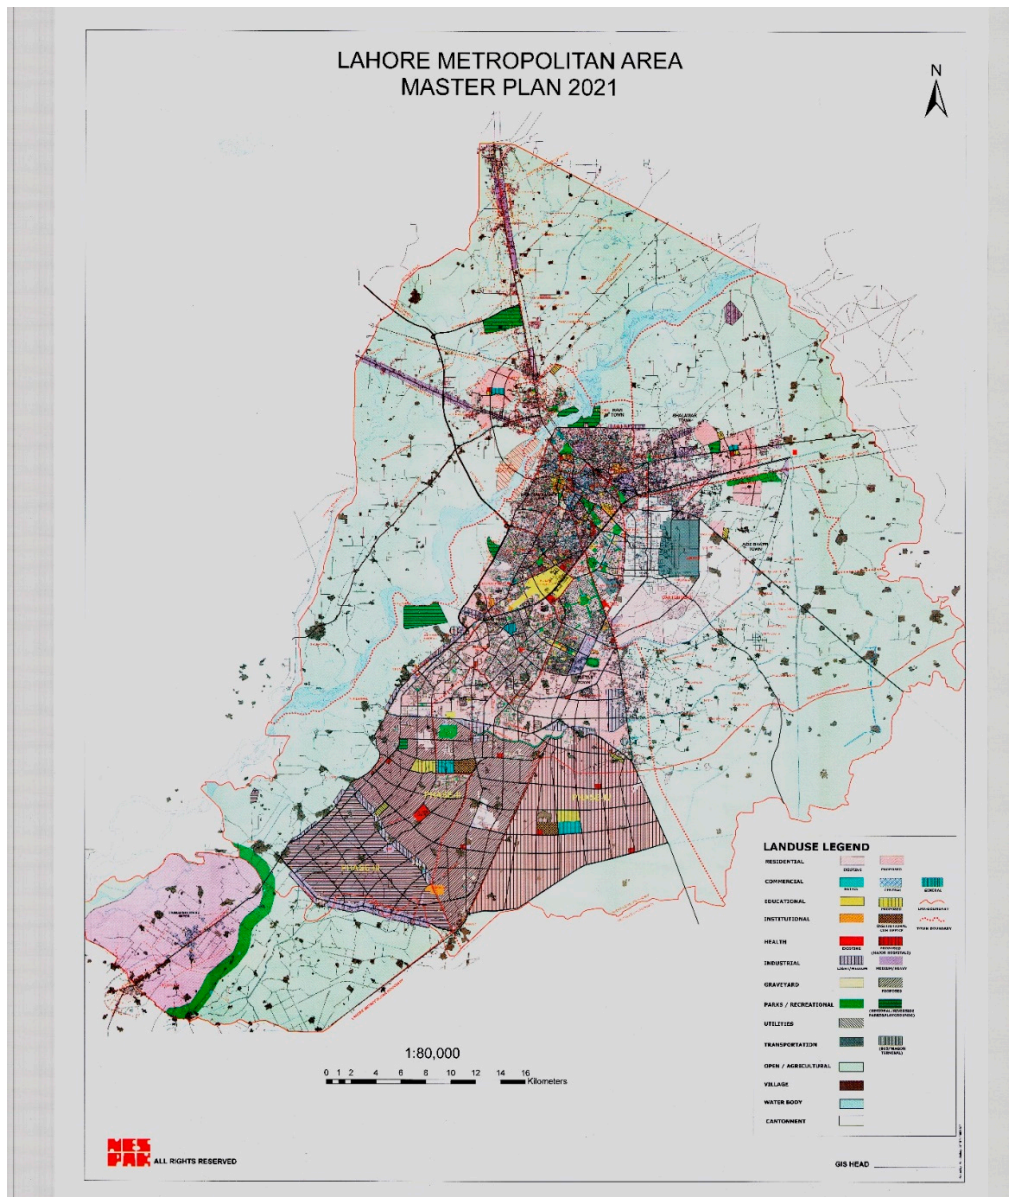

[https://lda.gov.pk/website/images/Integrated\\_Master\\_Plan\\_of\\_Lahore.jpg](https://lda.gov.pk/website/images/Integrated_Master_Plan_of_Lahore.jpg)

Figure S1 (b). Lahore Metropolitan area master Plan 2050

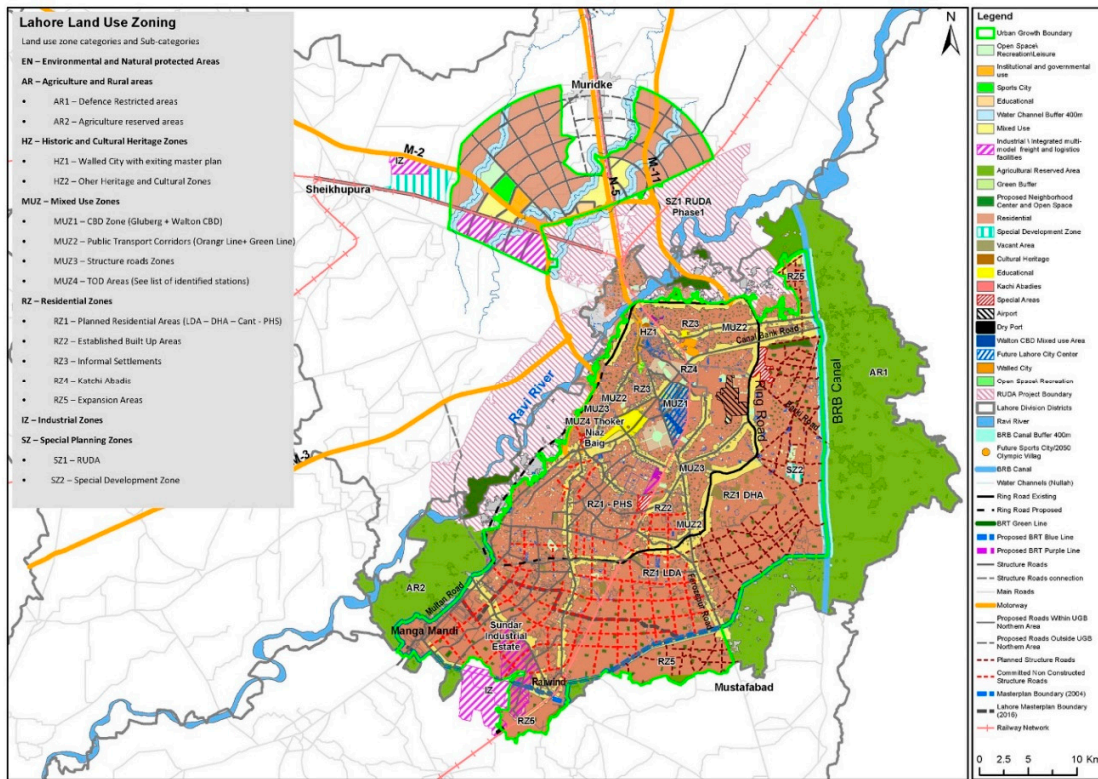

[https://lda.gov.pk/website/images/scnerio\\_master\\_plan\\_lahore\\_18\\_04\\_2022\\_full.jpg](https://lda.gov.pk/website/images/scnerio_master_plan_lahore_18_04_2022_full.jpg)

## References

1. Fry, I. Reducing emissions from deforestation and forest degradation: opportunities and pitfalls in developing a new legal regime. *Rev. Eur. Community Int. Environ. Law* **2008**, *17*, 166-182.
2. UNFCCC. *Factsheet: Reducing Emissions from Deforestation in Developing Countries: Approaches to Stimulate Action*. 2011. Available from: [http://unfccc.int/files/press/backgrounders/application/pdf/fact\\_sheet\\_reducing\\_emissions\\_from\\_deforestation.pdf](http://unfccc.int/files/press/backgrounders/application/pdf/fact_sheet_reducing_emissions_from_deforestation.pdf) (accessed on).
3. Page, P. *Report of the Ad Hoc Working Group on Long-term Cooperative Action under the Convention on the first part of its fifteenth session, held in Bonn from 15 to 24 May 2012*; 2012.
4. Herold, M.; Skutsch, M. Monitoring, reporting and verification for national REDD+ programmes: two proposals. *Environ. Res. Lett.* **2011**, *6*, 014002.
5. Skutsch, M.M.; Torres, A.B.; Mwampamba, T.H.; Ghilardi, A.; Herold, M. Dealing with locally-driven degradation: A quick start option under REDD+. *Carbon Balance Manag.* **2011**, *6*, 1-7.
